# Supplementary material for: Valley splitting and anomalous valley Hall effect in MoTe 2 /CrSCl heterostructure
Source: Royal Society of Chemistry journal article supplement (doi:10.1039/d5na00834d), 2025-12-05
Supplement: d5na00834d1.pdf [file d5na00834d1.pdf]

## Supplementary Information

# Valley splitting and anomalous valley Hall effect in MoTe<sub>2</sub>/CrSCl heterostructure

Jaehong Park<sup>a</sup>, Dongchul Sung<sup>a</sup>, Junho Yun<sup>a</sup>, and Suklyun Hong<sup>a,\*</sup>

<sup>a</sup> Department of Physics, Graphene Research Institute, Quantum Information Science and Technology Center, and KUU Quantum Materials Devices International Research Center, Sejong University, Seoul 05006, Korea

\*Corresponding author: [hong@sejong.ac.kr](mailto:hong@sejong.ac.kr)

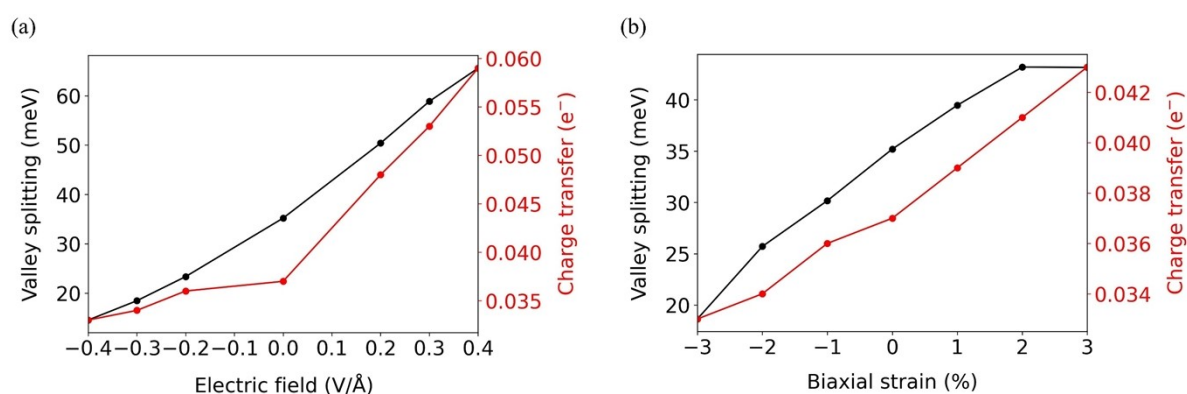

**Fig. S1** Valley splitting (black line) and interlayer charge transfer (red line) as functions of (a) the applied electric field and (b) the in-plane biaxial strain.
